# Supplementary material for: Fine Cocoa Fermentation with Selected Lactic Acid Bacteria: Fermentation Performance and Impact on Chocolate Composition and Sensory Properties
Source: MDPI journal article supplement (doi:10.3390/foods12020340), 2023-01-11
Supplement: s1 [file s1]

**Fine cocoa fermentation with selected Lactic Acid Bacteria: fermentation performance and impact on chocolate flavour**

Dea Korcari, Alberto Fanton, Giovanni Ricci, Noemi Sofia Rabitti, Monica Laureati, Johannes Hogenboom, Luisa Pellegrino, Davide Emide, Alberto Barbiroli, Maria Grazia Fortina

**Supplementary materials**

**Table S1.** List of sensory descriptors used to describe the samples with relevant definitions and reference standards.

| <b>Sensory dimension</b> | <b>Sensory Descriptor</b> | <b>Definition</b>                                                                               | <b>Reference Standard</b>                                                                                                                            |
|--------------------------|---------------------------|-------------------------------------------------------------------------------------------------|------------------------------------------------------------------------------------------------------------------------------------------------------|
| Appearance               | Brown color               | Characteristic perceived through the sense of sight referring to the brown color of chocolate   | Minimum of the scale (score 1): milk chocolate (Lindt & Sprungli S.p.A.)<br>Maximum of the scale (score 9): 100% criollo chocolate (Esselunga S.p.A) |
| Odor                     | Cocoa                     | Characteristic aroma of cocoa perceived orthonasally with the sense of smell                    | Cocoa powder Perugina (Nestlé Italiana S.p.A.)                                                                                                       |
|                          | Red Fruits                | Characteristic aroma of red fruits perceived orthonasally with the sense of smell               | NeroNero extra dark chocolate with raspberries and almond granules (Novi S.p.A.)                                                                     |
|                          | Roasted                   | Characteristic aroma of roasted/burnt perceived orthonasally with the sense of smell            | 100% criollo chocolate (Esselunga S.p.A)                                                                                                             |
|                          | Honey                     | Characteristic aroma of honey perceived orthonasally with the sense of smell                    | Excellence dark with honey and almonds (Lindt & Sprungli S.p.A.)                                                                                     |
| Taste                    | Sweet                     | One of the basic tastes caused by sweet compounds (e.g. sugar) perceived in the oral cavity     | Extra dark chocolate Perugina (Nestlé Italiana S.p.A.)                                                                                               |
|                          | Bitter                    | One of the basic tastes caused by bitter compounds (e.g. caffeine) perceived in the oral cavity | 100% criollo chocolate (Esselunga S.p.A)                                                                                                             |
|                          | Sour                      | One of the basic tastes caused by sour compounds (e.g. lemon) perceived in the oral cavity      | 100% criollo chocolate (Esselunga S.p.A)                                                                                                             |
| Flavour                  | Cocoa                     | Characteristic flavour of cocoa perceived retronasally when swallowing                          | Cocoa powder Perugina (Nestlé Italiana S.p.A.)                                                                                                       |

|                      |             |                                                                                               |                                                                                                                                                      |
|----------------------|-------------|-----------------------------------------------------------------------------------------------|------------------------------------------------------------------------------------------------------------------------------------------------------|
|                      | Red Fruits  | Characteristic flavour of red fruit perceived retronasally when swallowing                    | NeroNero extra dark chocolate with raspberries and almond granules (Novi S.p.A.)                                                                     |
|                      | Roasted     | Characteristic aroma of roasted/burnt perceived retronasally when swallowing                  | 100% criollo chocolate (Esselunga S.p.A)                                                                                                             |
|                      | Honey       | Characteristic flavour of honey perceived retronasally when swallowing                        | Excellence dark with honey and almonds (Lindt & Sprungli S.p.A.)                                                                                     |
| Mouthfeel sensations | Hardness    | Degree of compression between the incisor teeth obtained prior to the breaking of the product | Minimum of the scale (score 1): milk chocolate (Lindt & Sprungli S.p.A.)<br>Maximum of the scale (score 9): 100% criollo chocolate (Esselunga S.p.A) |
|                      | Astringency | Tactile sensation of dryness and puckering perceived in the oral cavity                       | 100% criollo chocolate (Esselunga S.p.A)                                                                                                             |

**Table S2.** Amounts in ppm of volatile compounds measured from cocoa mass and respective flavour descriptors.

| Volatile compounds    | Samples                  |         |         |         |        |        | Descriptor                                    |
|-----------------------|--------------------------|---------|---------|---------|--------|--------|-----------------------------------------------|
|                       | Control                  | A       | B       | C       | D      | E      |                                               |
|                       | Volatile compounds (ppm) |         |         |         |        |        |                                               |
| Methyl acetate        | 0.086                    | 0.085   | 0.068   | 0.08    | 0.104  | 0.074  | Green, fruity, fresh, rum and whiskey-like    |
| 2,3-Butandion         | 1.556                    | 4.631   | 5.179   | 1.145   | 0.824  | 0.921  | Sweet, buttery, creamy, milky                 |
| Acetic acid           | 231.979                  | 276.219 | 314.842 | 130.573 | 67.649 | 88.608 | Pungent, sour, overripe fruit                 |
| 3-Methyl butanal      | 1.704                    | 1.582   | 1.758   | 1.157   | 0.645  | 0.774  | Fruity, green, chocolate, nutty, leafy, cocoa |
| 2-Methyl butanal      | 0.565                    | 0.402   | 0.629   | 0.463   | 0.196  | 0.211  | Musty, rummy, nutty, cereal, caramel, fruity  |
| Pentanal              | 0.378                    | 0.437   | 0.541   | 0.107   | 0.11   | 0.257  | Winey, bready, cocoa, chocolate notes         |
| Hexanal               | 0.067                    | 0.208   | 0.109   | 0.03    | 0.037  | 0.163  | Green, woody, apple, grassy, orange           |
| 3-Methyl butyric acid | 4.46                     | 6.701   | 4.442   | 5.633   | 5.052  | 4.61   | Cheesy, dairy, creamy, sweet, berry           |
| 2-Methyl butyric acid | 2.403                    | 3.709   | 2.566   | 3.605   | 3.829  | 3.571  | Fruity, acidic, dairy, buttery                |
| 2-Heptanone           | 3.291                    | 9.884   | 6.016   | 2.799   | 1.515  | 3.413  | Cheese, fruity, coconut, waxy, green          |
| 2,3-Dimethyl pyrazine | 0.066                    | 0.073   | 0.066   | 0       | 0      | 0      | Nutty, nut skin, cocoa, coffee, walnut        |
| Butyrolactone         | 0.243                    | 0.217   | 0.203   | 0.1     | 0.081  | 0.074  | Milky, creamy with fruity afternotes          |

|                      |       |       |       |       |       |       |                                              |
|----------------------|-------|-------|-------|-------|-------|-------|----------------------------------------------|
| Benzaldehyde         | 0.57  | 0.733 | 0.8   | 0.545 | 0.419 | 0.425 | Sweet, oily, almond, cherry, nutty, woody    |
| Trimethyl pyrazine   | 0.402 | 0.391 | 0.357 | 0.345 | 0.29  | 0.31  | Toasted, nutty, earthy, chocolate, coffee    |
| Benzyl acetaldehyde  | 0.539 | 0.177 | 0.206 | 0.525 | 0     | 0.369 | Green, melon, fruity, citrus                 |
| Tetramethyl pyrazine | 5.22  | 3.788 | 2.962 | 5.926 | 5.26  | 3.638 | Nutty, musty, cocoa, peanut, coffee notes    |
| 2-Nonanone           | 1.837 | 4.093 | 3.061 | 1.318 | 1.556 | 2.213 | Cheesy, green, fruity, dairy, dirty, buttery |
| Nonanal              | 0.277 | 0.285 | 0.354 | 0.184 | 0.149 | 0.158 | Citrus, cucumber, and melon rind             |
| 2-Phenylethanol      | 6.088 | 6.258 | 7.83  | 4.771 | 4.357 | 4.961 | Floral, sweet, rosy and bready               |
| Phenethyl acetate    | 4.857 | 3.161 | 4.248 | 2.298 | 1.898 | 1.843 | Sweet, honey, floral, rosy                   |

A: inoculated with *L. fabifermentans* at t<sub>0</sub>; B: inoculated with *L. fabifermentans* at t<sub>0</sub> and t<sub>48</sub>; C: inoculated with *F. rossiae* at t<sub>0</sub>;

D: inoculated with *F. rossiae* at t<sub>0</sub> and t<sub>48</sub>; E: inoculated with both strains at t<sub>0</sub> and t<sub>48</sub>.

**Table S3.** Effect of samples (6), judges (10), and replicates (2) on the 14 sensory descriptors considered.

| Sensory dimension       | Sensory descriptor | De- | Samples  | Judges   | Replicates | J X S    | S X R    | J X R    |
|-------------------------|--------------------|-----|----------|----------|------------|----------|----------|----------|
| Appearance              | Brown color        |     | 93.81*** | 1.83n.s. | 0.10n.s.   | 1.83*    | 0.57n.s. | 1.83n.s. |
| Odor                    | Cocoa              |     | 13.45*** | 2.26*    | 0.00n.s.   | 1.52n.s. | 0.38n.s. | 0.75n.s. |
|                         | Red Fruits         |     | 3.15*    | 6.84***  | 3.31n.s.   | 1.97*    | 1.39n.s. | 0.97n.s. |
|                         | Roasted            |     | 27.59*** | 7.05***  | 1.79n.s.   | 2.27**   | 0.62n.s. | 1.46n.s. |
|                         | Honey              |     | 4.97**   | 1.77n.s. | 0.73n.s.   | 1.18n.s. | 0.36n.s. | 0.45n.s. |
| Taste                   | Sweet              |     | 10.08*** | 2.31*    | 0.00n.s.   | 1.45n.s. | 2.91*    | 1.56n.s. |
|                         | Bitter             |     | 30.31*** | 8.09***  | 0.06n.s.   | 1.14n.s. | 1.15n.s. | 1.53n.s. |
|                         | Sour               |     | 15.47*** | 8.65***  | 2.06n.s.   | 1.62n.s. | 2.23n.s. | 0.47n.s. |
| Flavour                 | Cocoa              |     | 10.04*** | 3.71**   | 0.24n.s.   | 1.12n.s. | 0.24n.s. | 1.95n.s. |
|                         | Red Fruits         |     | 11.25*** | 5.03***  | 6.41*      | 1.40n.s. | 1.01n.s. | 1.47n.s. |
|                         | Roasted            |     | 44.90*** | 2.42*    | 0.13n.s.   | 1.03n.s. | 0.39n.s. | 1.18n.s. |
|                         | Honey              |     | 33.47*** | 4.46***  | 0.06n.s.   | 1.13n.s. | 1.98n.s. | 2.01n.s. |
| Mouthfeel<br>sensations | Hardness           |     | 9.85***  | 4.76***  | 0.53n.s.   | 1.49n.s. | 0.50n.s. | 0.80n.s. |
|                         | Astringency        |     | 17.30*** | 11.19*** | 0.69n.s.   | 1.16n.s. | 0.46n.s. | 2.04n.s. |

\*\*\* significant at  $p < 0.001$ ; \*\* significant at  $p < 0.01$ ; \* significant at  $p < 0.05$ ; n.s. not significant

**Table S4.** Mean ratings (on a 9-point rating scale) obtained for the 6 dark chocolate samples for each sensory descriptor (\*\*\* significant at  $p < 0.001$ ; \*\* significant at  $p < 0.01$ ; \* significant at  $p < 0.05$ ). Different letters by row indicate significant differences ( $p < 0.05$ ) according to LSD post hoc test. A: inoculated with *L. fabifermentans* at  $t_0$ ; B: inoculated with *L. fabifermentans* at  $t_0$  and  $t_{48}$ ; C: inoculated with *F. rossiae* at  $t_0$ ; D: inoculated with *F. rossiae* at  $t_0$  and  $t_{48}$ ; E: inoculated with both strains at  $t_0$  and  $t_{48}$ .

| Sensory dimension | Sensory descriptor | Chocolate samples |       |       |       |       |         |
|-------------------|--------------------|-------------------|-------|-------|-------|-------|---------|
|                   |                    | A                 | B     | C     | D     | E     | Control |
| Appearance        | Brown color***     | 6.8d              | 5.2a  | 6.0c  | 5.8b  | 6.0c  | 7.0e    |
| Odor              | Cocoa ***          | 6.6b              | 5.9a  | 6.5b  | 5.9a  | 6.4b  | 6.6b    |
|                   | Red fruits *       | 4.5bc             | 4.5bc | 4.6bc | 4.4ab | 4.7c  | 4.2a    |
|                   | Roasted ***        | 6.4c              | 5.4a  | 5.7b  | 5.6ab | 6.2c  | 6.4c    |
|                   | Honey **           | 4.8a              | 5.5b  | 4.7a  | 4.7a  | 4.5a  | 4.6a    |
| Taste             | Sweet ***          | 5.4c              | 5.4c  | 5.4c  | 5.5c  | 4.8a  | 5.1b    |
|                   | Bitter ***         | 5.6c              | 5.4b  | 4.8a  | 4.6a  | 5.6c  | 5.6c    |
|                   | Sour ***           | 5.6a              | 5.6a  | 6.2b  | 5.6ab | 5.6a  | 6.0b    |
| Flavor            | Cocoa ***          | 6.5b              | 6.0a  | 6.3b  | 6.3b  | 6.3b  | 6.8c    |
|                   | Red fruits ***     | 4.8c              | 4.0a  | 3.8a  | 3.8a  | 4.5bc | 4.3b    |
|                   | Roasted ***        | 6.0b              | 5.6a  | 5.6a  | 6.2c  | 7.0d  | 6.8d    |
|                   | Honey ***          | 4.0a              | 5.6d  | 4.4b  | 4.8c  | 3.8a  | 3.8a    |
| Mouthfeel         | Hardness ***       | 6.4b              | 6.0a  | 6.4b  | 6.3b  | 6.5b  | 6.8c    |
|                   | Astringency ***    | 4.8a              | 4.8a  | 4.8a  | 5.5b  | 5.3b  | 4.9a    |

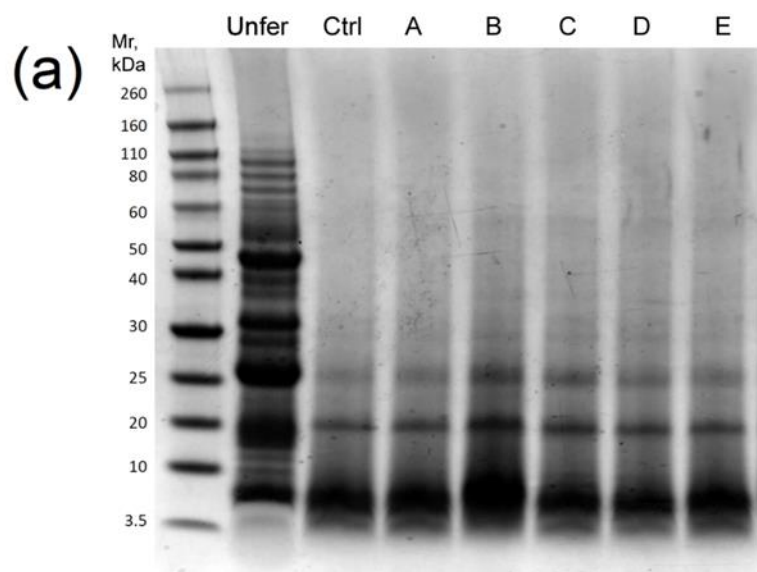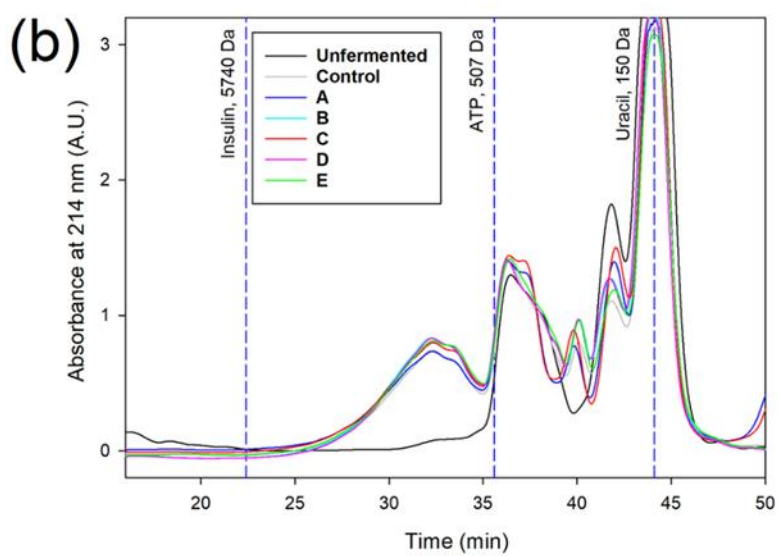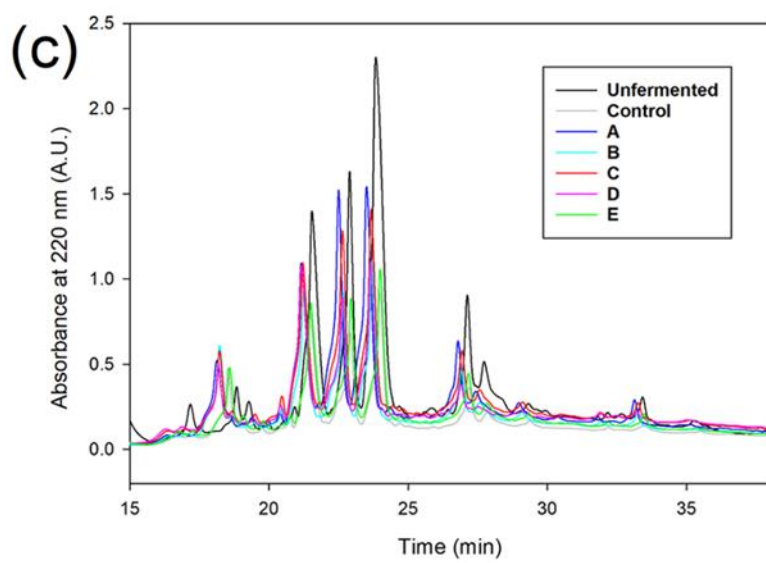



**Figure S1.** Protein and peptide pattern of unfermented and fermented samples. (a): SDS-PAGE of total protein extracts; Unfer: unfermented cocoa beans; Ctrl: spontaneous fermentation; A: inoculated with *L. fabifermentans* at  $t_0$ ; B: inoculated with *L. fabifermentans* at  $t_0$  and  $t_{48}$ ; C: inoculated with *F. rossiae* at  $t_0$ ; D: inoculated with *F. rossiae* at  $t_0$  and  $t_{48}$ ; E: inoculated with both strains at  $t_0$  and  $t_{48}$ . (b): SE-HPLC chromatograms of peptide extracted from cocoa beans. (c): RP-HPLC chromatograms of peptide extracted from cocoa beans.
